# Supplementary material
Source: Elsevier journal article supplement (https://www.sciencedirect.com/science/article/pii/S2341287919300067)
Supplement: mmc1 [file S2341287919300067:mmc1.pdf]

1. Soy: ☐ Padre ☐ Madre ☐ Tutor/a
2. Sexo de su hija/o: ☐ Hombre ☐ Mujer
3. Año de nacimiento de su hija/o:
4. Años transcurridos desde el debut de la diabetes:
5. Tipo de tratamiento de su hija/o: ☐ Insulina inyectada ☐ Insulina en bomba
6. Curso escolar de su hija/o:
7. Tipo de colegio: ☐ Público ☐ Con ☐ tado Priv ☐ b
8. ¿Pertenece a alguna asociación de personas con diabetes?
- ☐ Sí ☐ No
9. ¿Se ha visto obligado alguno de los padres/tutores a modificar su actividad laboral para atender a su hija/o en la escuela?
- ☐ Sí ☐ No
10. Cuando necesita obtener información sobre la diabetes de su hijo/a, ¿dónde la busca?
- (puede seleccionar varias respuestas)**
- ☐ En Internet ☐ En los profesionales sanitarios
- ☐ En la Asociación de diabetes ☐ Otros. Especificar:
11. ¿Dónde recibe su hijo/a la educación sobre la diabetes que precisa? **(puede seleccionar varias respuestas)**
- ☐ En la consulta de pediatría ☐ En los campamentos de verano
- ☐ No recibe tal educación ☐ Otros. Especificar:
12. ¿Han denegado la admisión de su hija/o en algún colegio por tener diabetes?
- ☐ Sí ☐ No
13. ¿Conoce la existencia del Protocolo de Atención al Niño/a y Adolescente con Diabetes en la Escuela que existe en Extremadura?
- ☐ Sí ☐ No
14. En caso afirmativo, ¿quién le informó sobre su existencia? **(puede seleccionar varias respuestas)**
- ☐ La/ el pediatra endocrino ☐ El colegio
- ☐ La Asociación de diabetes ☐ Otros. Especificar:
15. ¿A quién se ha informado en el colegio de que su hija/o padece diabetes? **(puede seleccionar varias respuestas)**
- ☐ A la Dirección del Centro ☐ Al tutor ☐ A nadie
- ☐ A todo el profesorado ☐ A los compañeros de clase

#### AUTOMANEJO DE LA DIABETES

16. ¿Sabe su hija/o medirse la glucemia?
- ☐ Sí ☐ No ☐ No sabe/no contesta
17. ¿Sabe su hija/o interpretar cuándo la glucemia está alta o baja?
- ☐ Sí ☐ No ☐ No sabe/no contesta

18. ¿Sabe su hija/o administrarse insulina?

☐ Sí ☐ No ☐ No sabe/no contesta

19. ¿Sabe su hija/o qué dosis y tipo de insulina tiene que administrarse?

Sí ☐ No ☐ No sabe/no contesta

20. ¿Qué lleva su hija/o siempre en la mochila por si ocurriera una hipoglucemia? (puede

seleccionar varias respuestas)

☐ Refrescos ☐ Azúcar o caramelos ☐ Pastillas de glucosa

☐ Galletas ☐ Otros. Especificar

21. ¿Necesita su hija/o realizarse controles glucémicos durante la jornada escolar?

☐ Sí ☐ No

22. ¿Quién ayuda a su hija/o a realizarse los controles glucémicos durante la jornada escolar?

No necesita ayuda Los profesores  
Los padres Otros. Especificar:

23. ¿Necesita su hija/o administrarse insulina durante la jornada escolar?

☐ Sí ☐ No

24. ¿Quién administra a su hija/o la insulina durante la jornada escolar?

El propio niño/a Los profesores  
Los padres Otros. Especificar:

## RECURSOS DISPONIBLES

25. ¿Existe un espacio reservado para realizarse los controles o pincharse la insulina en caso de que lo haga en horario escolar?

☐ Sí ☐ No ☐ No sabe/no contesta

26. ¿Existe en el colegio un frigorífico donde almacenar la insulina o glucagón?

☐ Sí ☐ No ☐ No sabe/no contesta

27. ¿Hay glucagón disponible en el colegio?

☐ Sí ☐ No ☐ No sabe/no contesta

28. ¿Alguien sabe en el colegio administrar el glucagón?

☐ Sí ☐ No ☐ No sabe/no contesta

## MANEJO DE LA DIABETES EN EL CENTRO EDUCATIVO

29. ¿Considera que en el colegio los profesores saben reconocer una hipoglucemia?

☐ Sí, la mayoría ☐ No, casi ninguno ☐ No sabe/no contesta

30. ¿Ha sufrido su hija/o alguna vez hipoglucemias en el colegio?

☐ Sí ☐ No ☐ No sabe/no contesta

**31. En caso afirmativo, ¿cómo ha actuado el colegio? (puede seleccionar varias respuestas)**

- ☐ Lo ha resuelto el propio niño.
- ☐ Se ha llamado a los padres.
- ☐ Se han proporcionado alimentos al niño.
- ☐ Se ha llamado al 112.
- ☐ No se ha hecho nada.

**32. ¿Ha sufrido su hija/o alguna vez hipoglucemias antes o durante un examen?**

Sí                      No                      No sabe/no contesta

**33. En caso afirmativo, ¿le dieron la oportunidad de hacer el examen en otro momento?**

Sí                      No                      A veces                      No sabe/no contesta

**34. ¿Considera que se mejoraría el control de la diabetes de su hija/o en el colegio si se le proporcionara más información a los profesores?**

☐ Sí                      ☐ No                      ☐ No sabe/no contesta

**35. ¿Ha necesitado su hija/o acudir al psicólogo por situaciones relacionadas o derivadas de la diabetes?**    Sí                      No

### **ADAPTACIÓN E INTEGRACIÓN EN EL CENTRO EDUCATIVO**

**36. Antes de tener diabetes, ¿cómo era la adaptación de su hija/o en el colegio?**

☐ Excelente    ☐ Buena                      ☐ Aceptable    ☐ RegularMal☐

**37. ¿Cómo fue la adaptación en el colegio tras el diagnóstico?**

☐ Excelente    ☐ Buena                      ☐ Aceptable    ☐ RegularMala☐

**38. ¿Cuál de los siguientes problemas o dificultades sufre o ha sufrido su hija/o en el colegio derivados de la diabetes? (puede seleccionar varias respuestas)**

- ☐ No ha presentado problemas o dificultades.
- ☐ Problemas de concentración.
- ☐ Problemas en cuanto el entusiasmo y la motivación.
- ☐ Problemas en el rendimiento escolar.
- ☐ Problemas en la relación con los profesores.
- ☐ Problemas en la relación con los compañeros de clase.

**39. ¿Ha sufrido su hija/o algún tipo de trato discriminatorio en el colegio?**

☐ Sí                      ☐ No                      ☐ No sabe/no contesta

**40. En caso afirmativo, ¿por parte de quién?**

La Dirección del centro                      Los profesores
